# Supplementary material for: Identification of a Novel Indel Variant in the DARS2 Gene in Russian Patients with Leukoencephalopathy with Brainstem and Spinal Cord Involvement and Lactate Elevation
Source: MDPI journal article supplement (doi:10.3390/genes15050615), 2024-05-11
Supplement: s1 [file s1]

| Target       | Location                                                               | Forward                       | Reverse                         |
|--------------|------------------------------------------------------------------------|-------------------------------|---------------------------------|
| <i>DARS2</i> | flanking the indel c.1675-1256_*115delinsGCAACATT<br>TCGGCAACATTCCAACC | 5' GATTACACGTGCGCACTAACAC - 3 | 5' GATTCTCTTGATGAGGATGATGAAG-3' |
| <i>DARS2</i> | 17 ex                                                                  | 5' GGAACGATGGTTGGCTACAG-3'    | 5'-GACTTTAGCCTTGGGGAAGC-5'      |

**Suppl. Figure 1.** Primer’s sequences for multiplex analysis for novel indel variant in the *DARS2* gene.
